# Supplementary material
Source: HighWire-hosted journal article supplement (https://bmjopen.bmj.com/content/9/3/e026354)
Supplement: inline-supplementary-material-2 [file inline-supplementary-material-2.pdf]

**Table S2**

Relation between moving to public reconstruction housing and the proportion of social isolation: non matching data (n=393)..

| Living environment | Baseline  | Prefabricated temporary housing        |                                      | Odds ratio | 95% CI       | p value |
|--------------------|-----------|----------------------------------------|--------------------------------------|------------|--------------|---------|
|                    | Follow up | Prefabricated temporary housing<br>290 | Public reconstruction housing<br>103 |            |              |         |
| Social isolation   |           |                                        |                                      |            |              |         |
| Baseline*          |           | 30.7%                                  | 35.9%                                | 1.35       | 1.06 to 1.72 | 0.014   |
| 1 year follow up†  |           | 29.3%                                  | 41.7%                                |            |              |         |
| 2 year follow up‡  |           | 26.6%                                  | 45.6%                                |            |              |         |

\*Baseline, 4 years after the GEJE

†1 year follow up: 5 years after the GEJE

‡2 year follow up: 6 years after the GEJE
